# Supplementary material for: Insulin-like Growth Factor II Prevents MPP+ and Glucocorticoid Mitochondrial-Oxidative and Neuronal Damage in Dopaminergic Neurons
Source: MDPI journal article supplement (doi:10.3390/antiox11010041), 2021-12-24
Supplement: s1 [file s1]

## ***Supplementary Material***

### *1. List of Abbreviations*

(AOPP) Advanced-oxidation protein products  
(CO) Control cells  
(CORT) Corticosterone  
(FCCP) Carbonyl cyanide-4-(trifluoromethoxy)phenylhydrazone  
(FJ) Fluoro-Jade B™  
(GC) Glucocorticoid  
(GPX) Glutathione peroxidase  
(GR) Glucocorticoid receptors  
(HPA) Hypothalamic–pituitary–adrenal axis  
(IGF-IR) Insuline-like growth factor I receptor  
(IGF-II) Insulin-like growth factor II  
(IGF-IIR) IGFII/Mannose 6-Phosphate receptor  
(InRs) Insulin receptors  
(JC-1) 5,5,6',6'-tetrachloro-1,1',3,3'-tetraethyl benzimidazolcarbocyanine iodide  
(LDH) Lactate dehydrogenase  
(LOOH) Lipid hydroperoxides  
(MIFE) Mifepristone  
(MPP+) 1-methyl-4-phenylpyridinium  
(mΔΨ) Mitochondrial membrane potential  
(Nrf2) Nuclear factor (erythroid-derived 2)-like 2  
(OCR) Mitochondrial oxygen consumption rate  
(PD) Parkinson's disease  
(PKCα) Protein kinase C alpha  
(ROS) Reactive oxygen species  
(SRC) Spare respiratory capacity  
(TAS) Total antioxidant status  
(TH) Tyrosine hydroxylase

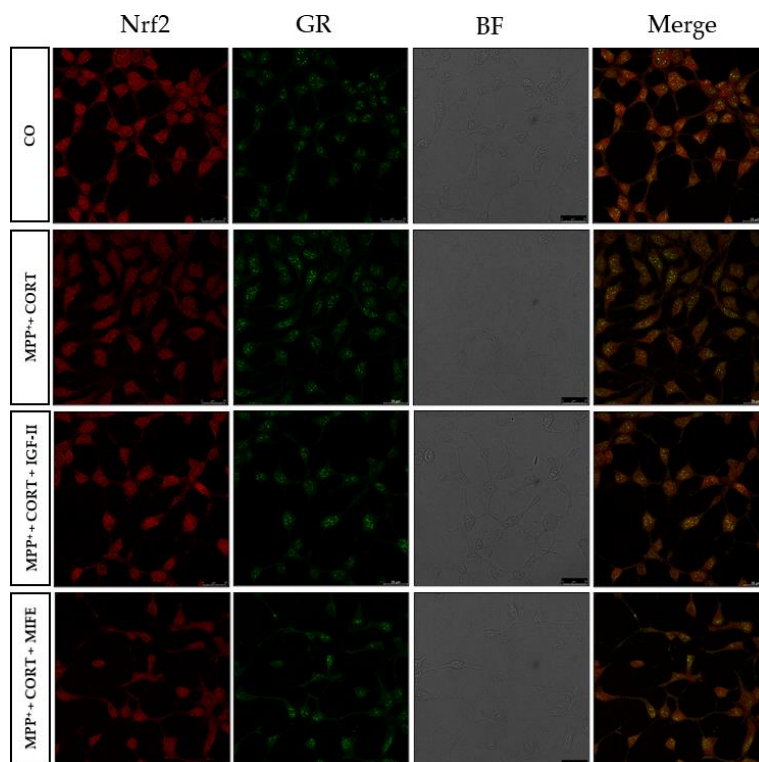

**Figure S1.** Study of intracellular signalling pathways in SN4741 neuronal cells after 2.5 h of incubation with the combination of corticosterone and MPP<sup>+</sup> (CORT + MPP<sup>+</sup>) in the presence or absence of IGF-II. Representative immunocytochemistry stain for GR and Nrf2 (63X). CO: control cells. BF: Bright Field.
